# Supplementary material
Source: PubMed Central journal article supplement (PMC3318641)

### Supplementary Table S1. HSV-1 and -2 plasmid inventory and expression analysis.

Listed is the final plasmid collection used for printing protein microarrays. HSV-1 and HSV-2 plasmids were prepared by PCR and homologous recombination, and expressed in IVTT reactions. Reactions containing non-recombinant plasmid or no plasmid were used as controls (not shown). IVTT reactions were then printed directly onto nitrocellulose and protein expression verified using antibodies to the N- and C- terminal polyhistidine (HIS) and hemagglutinin (HA) epitope tags. Triplicate arrays were probed with anti-HIS and anti-HA and averaged. Signals  $> \text{Avg C} + 2\text{SD}$  for either or both tags were taken to indicate protein expression. See Materials and Methods for details.

| plasmid name     | QC PCR | Seq  | HIS        | HA         | plasmid name     | QC PCR | Seq  | HIS        | HA         |
|------------------|--------|------|------------|------------|------------------|--------|------|------------|------------|
| HSV1_UL1         | ++     | 99%  | Red        | Green      | HSV2_UL1         | ++     | 95%  | Red        | Red        |
| HSV1_UL2         |        | 89%  | Black      | Green      | HSV2_UL2         | ++     |      | Red        | Green      |
| HSV1_UL3         | ++     | 99%  | Red        | Red        | HSV2_UL3         | ++     | 100% | Red        | Red        |
| HSV1_UL4         | ++     | 99%  | Red        | Red        | HSV2_UL4         | ++     |      | Red        | Red        |
| HSV1_UL5         | ++     | 97%  | Dark Red   | Green      | HSV2_UL5         | ++     | 91%  | Red        | Dark Red   |
| HSV1_UL6         |        | 83%, | Dark Green | Green      | HSV2_UL6         | ++     |      | Red        | Green      |
| HSV1_UL7         |        | 96%  | Red        | Dark Red   | HSV2_UL7         | ++     |      | Red        | Red        |
| HSV1_UL8         |        | 97%  | Red        | Dark Red   | HSV2_UL8         | ++     | 88%  | Red        | Red        |
| HSV1_UL9         |        | 96%  | Red        | Green      | HSV2_UL9         | ++     | 96%  | Dark Green | Dark Green |
| HSV1_UL10        | ++     | 94%  | Red        | Green      | HSV2_UL10        | ++     |      | Dark Red   | Dark Green |
| HSV1_UL11        | ++     | 99%  | Green      | Green      | HSV2_UL11        | ++     | 100% | Green      | Green      |
| HSV1_UL12        |        | 96%  | Dark Green | Green      | HSV2_UL12        | -      | 94%  | Green      | Green      |
| HSV1_UL13        | ++     | 97%  | Dark Red   | Green      | HSV2_UL13        | ++     |      | Red        | Dark Green |
| HSV1_UL14        | ++     | 99%  | Dark Red   | Red        | HSV2_UL14        | ++     | 100% | Green      | Dark Red   |
| HSV1_UL15        |        |      | White      | White      | HSV2_UL15        |        |      | Red        | Dark Red   |
| HSV1_UL15 exon 1 | ++     | 97%  | Red        | Green      | HSV2_UL15 exon 1 | +      | 100% | Dark Red   | Red        |
| HSV1_UL15 exon 2 | ++     | 97%  | Green      | Black      | HSV2_UL15 exon 2 | ++     | 95%  | Black      | Dark Green |
| HSV1_UL16        | ++     | 83%  | Dark Red   | Green      | HSV2_UL16        | ++     | 100% | Dark Red   | Dark Red   |
| HSV1_UL17        |        | 95%  | Dark Red   | Dark Red   | HSV2_UL17        | ++     | 93%  | Green      | Dark Red   |
| HSV1_UL18        | ++     | 96%  | Dark Red   | Dark Red   | HSV2_UL18        | ++     | 95%  | Dark Red   | Red        |
| HSV1_UL19        |        |      | Red        | Red        | HSV2_UL19        |        |      | Green      | Green      |
| HSV1_UL20        | ++     | 99%  | Red        | Red        | HSV2_UL20        | ++     | 100% | Red        | Black      |
| HSV1_UL21        | ++     | 96%  | Red        | Dark Red   | HSV2_UL21        | ++     | 99%  | Red        | Red        |
| HSV1_UL22        |        | 87%  | Red        | Green      | HSV2_UL22        | ++     | 96%  | Dark Green | Dark Green |
| HSV1_UL23        | ++     | 97%  | Red        | Dark Red   | HSV2_UL23        | ++     | 100% | Dark Red   | Red        |
| HSV1_UL24        | ++     | 98%  | Dark Red   | Dark Green | HSV2_UL24        | ++     | 100% | Red        | Dark Green |
| HSV1_UL25        | ++     | 98%  | Red        | Black      | HSV2_UL25        | ++     |      | Red        | Dark Green |
| HSV1_UL26        |        | 85%  | Red        | Dark Red   | HSV2_UL26        | ++     |      | Dark Red   | Green      |
| HSV1_UL26.5      |        | 94%  | Dark Green | Green      | HSV2_UL26.5      | +      | 80%  | Dark Green | Dark Red   |
| HSV1_UL27        |        | 60%  | Dark Red   | Green      | HSV2_UL27        | ++     | 99%  | Dark Green | Dark Green |
| HSV1_UL28        |        | 95%  | Red        | Dark Green | HSV2_UL28        | -      | 85%  | Dark Red   | Red        |

|             |    |      |                                                                                     |            |    |      |                                                                                       |
|-------------|----|------|-------------------------------------------------------------------------------------|------------|----|------|---------------------------------------------------------------------------------------|
| HSV1_UL29   | ++ | 98%  |    | HSV2_UL29  | -  | 97%  |    |
| HSV1_UL30   |    | 99%  |    | HSV2_UL30  | -  | 92%  |    |
| HSV1_UL31   | ++ | 97%  |    | HSV2_UL31  | ++ |      |    |
| HSV1_UL32   |    | 95%  |    | HSV2_UL32  | ++ |      |    |
| HSV1_UL33   | ++ | 99%  |    | HSV2_UL33  | ++ | 100% |    |
| HSV1_UL34   |    | 82%  |    | HSV2_UL34  | ++ | 99%  |    |
| HSV1_UL35   | ++ | 100% |    | HSV2_UL35  | ++ | 100% |    |
| HSV1_UL37   |    |      |    | HSV2_UL37  |    |      |    |
| HSV1_UL38   | ++ | 87%  |    | HSV2_UL38  | +  |      |    |
| HSV1_UL39   |    | 96%  |    | HSV2_UL39  | ++ |      |    |
| HSV1_UL40   | ++ | 96%  |    | HSV2_UL40  | ++ | 100% |    |
| HSV1_UL41   | ++ | 93%  |    | HSV2_UL41  | ++ | 88%  |    |
| HSV1_UL42   |    | 83%  |    | HSV2_UL42  | ++ | 100% |    |
| HSV1_UL43   |    | 97%  |    | HSV2_UL43  | ++ |      |    |
| HSV1_UL44   |    | 93%  |    | HSV2_UL44  | ++ | 94%  |    |
| HSV1_UL45   |    | 99%  |    | HSV2_UL45  | ++ | 99%  |    |
| HSV1_UL46   |    |      |    | HSV2_UL46  |    |      |    |
| HSV1_UL47   |    | 89%  |    | HSV2_UL47  | ++ | 97%  |    |
| HSV1_UL48   |    | 96%  |    | HSV2_UL48  |    | 98%  |    |
| HSV1_UL49   |    | 95%  |    | HSV2_UL49  | ++ |      |    |
| HSV1_UL49.5 | ++ | 100% |    | HSV2_UL49A | ++ |      |    |
| HSV1_UL50   | ++ | 96%  |   | HSV2_UL50  | ++ | 100% |   |
| HSV1_UL51   | ++ | 98%  |  | HSV2_UL51  | ++ | 100% |  |
| HSV1_UL52   | ++ | 93%  |  | HSV2_UL52  | -  |      |  |
| HSV1_UL53   | ++ | 82%  |  | HSV2_UL53  | ++ | 99%  |  |
| HSV1_UL54   |    |      |  | HSV2_UL54  | ++ | 91%  |  |
| HSV1_UL55   | ++ | 93%  |  | HSV2_UL55  | ++ | 100% |  |
| HSV1_UL56   | ++ | 88%  |  | HSV2_UL56  | ++ | 100% |  |
| HSV1_US01   | ++ | 98%  |  | HSV2_US1   | ++ | 80%  |  |
| HSV1_US02   |    | 98%  |  | HSV2_US2   | ++ |      |  |
| HSV1_US03   | ++ | 96%  |  | HSV2_US3   |    | 97%  |  |
| HSV1_US04   |    | 99%  |  | HSV2_US4   | ++ |      |  |
| HSV1_US05   | ++ | 99%  |  | HSV2_US5   | ++ | 100% |  |
| HSV1_US06   | ++ | 88%  |  | HSV2_US6   | ++ | 98%  |  |
| HSV1_US07   | ++ | 97%  |  | HSV2_US7   | ++ | 92%  |  |
| HSV1_US08   |    | 96%  |  | HSV2_US8   | ++ |      |  |
| HSV1_US08.5 | ++ | 99%  |  | HSV2_US8A  | ++ | 97%  |  |
| HSV1_US09   | ++ | 100% |  | HSV2_US9   | ++ | 99%  |  |
| HSV1_US10   | ++ | 98%  |  | HSV2_US10  | ++ | 90%  |  |
| HSV1_US11   | ++ | 88%  |  | HSV2_US11  | ++ | 100% |  |
| HSV-1_US12  | +  | 100% |  | HSV2_US12  | ++ |      |  |

HSV1\_RS1/ICP4  
 HSV1\_RS1'/ICP4  
 HSV1\_RL1/ICP34.5

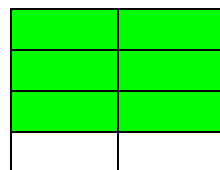

HSV2\_RS1/ICP4  
 HSV2\_RL1  
 HSV2\_RL1, exon1

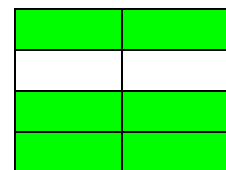

HSV1\_RL2/ICP0  
HSV1\_RL2'/ICP0

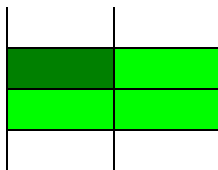

HSV2\_RL1, exon2  
HSV2\_RL2, exon1  
HSV2\_RL2, exon2  
HSV2\_RL2, exon3

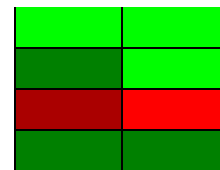

**Signal Intensity**

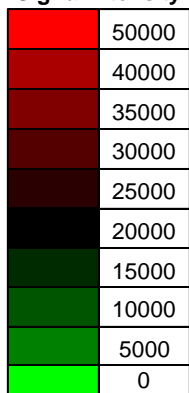

Supplement: supp_86.8.4328_TableS1.pdf [file supp_86.8.4328_TableS1.pdf]
